# Supplementary material for: Identification of genes related to chlamydospore formation in Clonostachys rosea 67‐1
Source: PubMed Central journal article supplement (PMC6341034; doi:10.1002/mbo3.624), 2018-04-10
Supplement: MBO3-8-e00624-s001.pdf [file MBO3-8-e00624-s001.pdf]

**Supplementary Table S1.** List of DEGs in *C. rosea* 67-1 at 36 h during chlamydospore formation.

| <b>Gene ID</b>    | <b>Up/Down regulation</b> | <b>Blast NR</b>                         |
|-------------------|---------------------------|-----------------------------------------|
| <i>Cch103851</i>  | up                        | hypothetical protein                    |
| <i>Cch3324</i>    | up                        | hypothetical protein                    |
| <i>Cch12013</i>   | up                        | hypothetical protein                    |
| <i>Cch14835</i>   | up                        | hypothetical protein                    |
| <i>Cch5859</i>    | up                        | hypothetical protein                    |
| <i>Cch46361</i>   | up                        | hypothetical protein                    |
| <i>Cch42624</i>   | up                        | hypothetical protein                    |
| <i>Cch20390</i>   | up                        | hypothetical protein                    |
| <i>Cch28712</i>   | up                        | hypothetical protein                    |
| <i>Cch1511151</i> | up                        | hypothetical protein                    |
| <i>Cch3709</i>    | up                        | hypothetical protein                    |
| <i>Cch16182</i>   | up                        | hypothetical protein                    |
| <i>Cch151121</i>  | up                        | hypothetical protein                    |
| <i>Cch34222</i>   | up                        | hypothetical protein                    |
| <i>Cch1716</i>    | up                        | hypothetical protein                    |
| <i>Cch261574</i>  | up                        | hypothetical protein                    |
| <i>Cch5076</i>    | up                        | hypothetical protein                    |
| <i>Cch3684</i>    | up                        | hypothetical protein                    |
| <i>Cch224</i>     | up                        | hypothetical protein                    |
| <i>Cch23444</i>   | up                        | hypothetical protein                    |
| <i>Cch36051</i>   | up                        | hypothetical protein                    |
| <i>Cch56334</i>   | up                        | hypothetical protein                    |
| <i>Cch34648</i>   | up                        | hypothetical protein                    |
| <i>Cch281219</i>  | up                        | hypothetical protein                    |
| <i>Cch17159</i>   | up                        | hypothetical protein                    |
| <i>Cch13313</i>   | up                        | hypothetical protein                    |
| <i>Cch30612</i>   | up                        | hypothetical protein                    |
| <i>Cch4045</i>    | up                        | hypothetical protein                    |
| <i>Cch9310</i>    | up                        | hypothetical protein                    |
| <i>Cch29548</i>   | up                        | hypothetical protein                    |
| <i>Cch13721</i>   | up                        | hypothetical protein                    |
| <i>Cch3708</i>    | up                        | not hit                                 |
| <i>Cch49029</i>   | up                        | not hit                                 |
| <i>Cch17429</i>   | up                        | not hit                                 |
| <i>Cch3878</i>    | up                        | not hit                                 |
| <i>Cch83528</i>   | up                        | not hit                                 |
| <i>Cch1857</i>    | up                        | not hit                                 |
| <i>Cch3313</i>    | up                        | not hit                                 |
| <i>Cch43984</i>   | up                        | not hit                                 |
| <i>Cch25334</i>   | up                        | not hit                                 |
| <i>Cch50921</i>   | up                        | not hit                                 |
| <i>Cch10959</i>   | up                        | not hit                                 |
| <i>Cch56333</i>   | up                        | L-lactate dehydrogenase                 |
| <i>Cch4046</i>    | up                        | ACB 4-hydroxyacetophenone monooxygenase |

|                   |      |                                                  |
|-------------------|------|--------------------------------------------------|
| <i>Cch1511182</i> | up   | phosphatidylserine decarboxylase                 |
| <i>Cch3794</i>    | up   | NADH:flavin oxidoreductase                       |
| <i>Cch10991</i>   | up   | alcohol dehydrogenase 1                          |
| <i>Cch30435</i>   | up   | acyl esterases                                   |
| <i>Cch7218</i>    | up   | nitroreductase family protein                    |
| <i>Cch30433</i>   | up   | aldehyde dehydrogenase                           |
| <i>Cch45345</i>   | up   | nitrosoguanidine resistance protein              |
| <i>Cch30429</i>   | up   | polyketide hydroxylase                           |
| <i>Cch30431</i>   | up   | ketosteroid isomerase                            |
| <i>Cch1749</i>    | up   | phosphate transport protein                      |
| <i>Cch281265</i>  | up   | sugar transporter                                |
| <i>Cch84812</i>   | up   | ABC-2 type transporter                           |
| <i>Cch56332</i>   | up   | glycosyltransferase family 4 protein             |
| <i>Cch1304</i>    | up   | H <sup>+</sup> -transporting ATPase              |
| <i>Cch23923</i>   | up   | general substrate transporter                    |
| <i>Cch30437</i>   | up   | glutathione S-transferase                        |
| <i>Cch67214</i>   | up   | glucan endo-1,3-beta-glucosidase A1-like protein |
| <i>Cch43218</i>   | up   | trypsin-like protease                            |
| <i>Cch295103</i>  | up   | endochitinase-like protein                       |
| <i>Cch230341</i>  | up   | endochitinase-like protein                       |
| <i>Cch3770</i>    | up   | serine protease                                  |
| <i>Cch31832</i>   | up   | serine protease                                  |
| <i>Cch16415</i>   | up   | secreted serine protease protein                 |
| <i>Cch3466</i>    | down | hypothetical protein                             |
| <i>Cch4881</i>    | down | hypothetical protein                             |
| <i>Cch3203</i>    | down | hypothetical protein                             |
| <i>Cch6756</i>    | down | hypothetical protein                             |
| <i>Cch3314</i>    | down | hypothetical protein                             |
| <i>Cch21617</i>   | down | hypothetical protein                             |
| <i>Cch19611</i>   | down | hypothetical protein                             |
| <i>Cch1955144</i> | down | hypothetical protein                             |
| <i>Cch4399</i>    | down | hypothetical protein                             |
| <i>Cch4522</i>    | down | hypothetical protein                             |
| <i>Cch6751</i>    | down | hypothetical protein                             |
| <i>Cch4392</i>    | down | hypothetical protein                             |
| <i>Cch1575</i>    | down | hypothetical protein                             |
| <i>Cch36012</i>   | down | hypothetical protein                             |
| <i>Cch379</i>     | down | hypothetical protein                             |
| <i>Cch60725</i>   | down | hypothetical protein                             |
| <i>Cch726</i>     | down | hypothetical protein                             |
| <i>Cch5604</i>    | down | hypothetical protein                             |
| <i>Cch2058</i>    | down | hypothetical protein                             |
| <i>Cch2235</i>    | down | hypothetical protein                             |
| <i>Cch9554</i>    | down | hypothetical protein                             |
| <i>Cch109534</i>  | down | hypothetical protein                             |
| <i>Cch40383</i>   | down | hypothetical protein                             |

|                  |      |                      |
|------------------|------|----------------------|
| <i>Cch5983</i>   | down | hypothetical protein |
| <i>Cch542</i>    | down | hypothetical protein |
| <i>Cch29581</i>  | down | hypothetical protein |
| <i>Cch5612</i>   | down | hypothetical protein |
| <i>Cch169413</i> | down | hypothetical protein |
| <i>Cch32524</i>  | down | hypothetical protein |
| <i>Cch723</i>    | down | hypothetical protein |
| <i>Cch6597</i>   | down | hypothetical protein |
| <i>Cch3485</i>   | down | hypothetical protein |
| <i>Cch12641</i>  | down | hypothetical protein |
| <i>Cch51041</i>  | down | hypothetical protein |
| <i>Cch8691</i>   | down | hypothetical protein |
| <i>Cch4065</i>   | down | hypothetical protein |
| <i>Cch6933</i>   | down | hypothetical protein |
| <i>Cch69027</i>  | down | hypothetical protein |
| <i>Cch30823</i>  | down | hypothetical protein |
| <i>Cch5511</i>   | down | hypothetical protein |
| <i>Cch41720</i>  | down | hypothetical protein |
| <i>Cch241141</i> | down | hypothetical protein |
| <i>Cch43951</i>  | down | hypothetical protein |
| <i>Cch4461</i>   | down | hypothetical protein |
| <i>Cch10826</i>  | down | hypothetical protein |
| <i>Cch30917</i>  | down | hypothetical protein |
| <i>Cch4509</i>   | down | hypothetical protein |
| <i>Cch28154</i>  | down | hypothetical protein |
| <i>Cch4389</i>   | down | hypothetical protein |
| <i>Cch28015</i>  | down | hypothetical protein |
| <i>Cch7624</i>   | down | hypothetical protein |
| <i>Cch552</i>    | down | hypothetical protein |
| <i>Cch16166</i>  | down | hypothetical protein |
| <i>Cch56454</i>  | down | hypothetical protein |
| <i>Cch661</i>    | down | hypothetical protein |
| <i>Cch46524</i>  | down | hypothetical protein |
| <i>Cch15312</i>  | down | not hit              |
| <i>Cch43422</i>  | down | not hit              |
| <i>Cch10320</i>  | down | not hit              |
| <i>Cch20398</i>  | down | not hit              |
| <i>Cch4214</i>   | down | not hit              |
| <i>Cch72532</i>  | down | not hit              |
| <i>Cch6834</i>   | down | not hit              |
| <i>Cch11524</i>  | down | not hit              |
| <i>Cch50927</i>  | down | not hit              |
| <i>Cch46349</i>  | down | not hit              |
| <i>Cch49910</i>  | down | not hit              |
| <i>Cch4215</i>   | down | not hit              |
| <i>Cch28736</i>  | down | not hit              |

|                  |      |                                                    |
|------------------|------|----------------------------------------------------|
| <i>Cch3520</i>   | down | not hit                                            |
| <i>Cch8215</i>   | down | not hit                                            |
| <i>Cch28735</i>  | down | not hit                                            |
| <i>Cch5676</i>   | down | not hit                                            |
| <i>Cch45010</i>  | down | not hit                                            |
| <i>Cch7757</i>   | down | not hit                                            |
| <i>Cch20396</i>  | down | not hit                                            |
| <i>Cch23935</i>  | down | not hit                                            |
| <i>Cch5677</i>   | down | not hit                                            |
| <i>Cch42018</i>  | down | not hit                                            |
| <i>Cch2805</i>   | down | not hit                                            |
| <i>Cch3106</i>   | down | not hit                                            |
| <i>Cch14012</i>  | down | not hit                                            |
| <i>Cch129352</i> | down | not hit                                            |
| <i>Cch1769</i>   | down | not hit                                            |
| <i>Cch33146</i>  | down | transcriptional activator protein-like protein     |
| <i>Cch15311</i>  | down | zinc finger domain-containing protein              |
| <i>Cch553</i>    | down | timethylaniline monooxygenase                      |
| <i>Cch2968</i>   | down | aldehyde dehydrogenase                             |
| <i>Cch26936</i>  | down | D-2-hydroxyacid dehydrogenase-like protein         |
| <i>Cch26965</i>  | down | probable maltose permease                          |
| <i>Cch8919</i>   | down | formate dehydrogenase-like protein                 |
| <i>Cch4847</i>   | down | cytochrome p450 protein                            |
| <i>Cch3932</i>   | down | polyphosphatidylinositol phosphatase-like protein  |
| <i>Cch1111</i>   | down | phosphoenolpyruvate carboxykinase                  |
| <i>Cch17434</i>  | down | salicylate hydroxylase protein                     |
| <i>Cch47820</i>  | down | dihydrodipicolinate synthase                       |
| <i>Cch21025</i>  | down | translation initiation factor                      |
| <i>Cch5729</i>   | down | catalase/peroxidase HPI                            |
| <i>Cch18192</i>  | down | MFS transporter                                    |
| <i>Cch17433</i>  | down | MFS transporter                                    |
| <i>Cch231219</i> | down | major facilitator superfamily transporter protein  |
| <i>Cch59417</i>  | down | hexose transporter-like protein                    |
| <i>Cch59417</i>  | down | transporter-like protein                           |
| <i>Cch11055</i>  | down | transporter-like protein                           |
| <i>Cch3849</i>   | down | sphingoid long-chain base transporter-like protein |
| <i>Cch34341</i>  | down | sphingoid long-chain base transporter-like protein |
| <i>Cch2086</i>   | down | methyltransferase                                  |
| <i>Cch2081</i>   | down | glutamyl-tRNA(gln) amidotransferase subunit A      |
| <i>Cch1803</i>   | down | glucose transporter                                |
| <i>Cch1231</i>   | down | glucose transporter rco-like protein               |
| <i>Cch396</i>    | down | chitinase                                          |
| <i>Cch129137</i> | down | glucan 1,4-alpha-glucosidase                       |
| <i>Cch4866</i>   | down | glycoside hydrolase family 93                      |
| <i>Cch1725</i>   | down | N-acetyl-beta-D-glucosaminidase                    |
| <i>Cch56481</i>  | down | beta-glucosidase A-like protein                    |

|                 |      |                            |
|-----------------|------|----------------------------|
| <i>Cch34520</i> | down | endo-1,3(4)-beta-glucanase |
| <i>Cch9226</i>  | down | endo-1,3(4)-beta-glucanase |

---
